# Supplementary material for: Genetic Regulation of Major Immunogenic Protein Accumulation in Peanut Seeds
Source: Research Square preprint supplement (doi:10.21203/rs.3.rs-8431108/v1), 2026-01-09
Supplement: Supplementary file 1 [file 2c4b59a525b550f030832d34.docx]

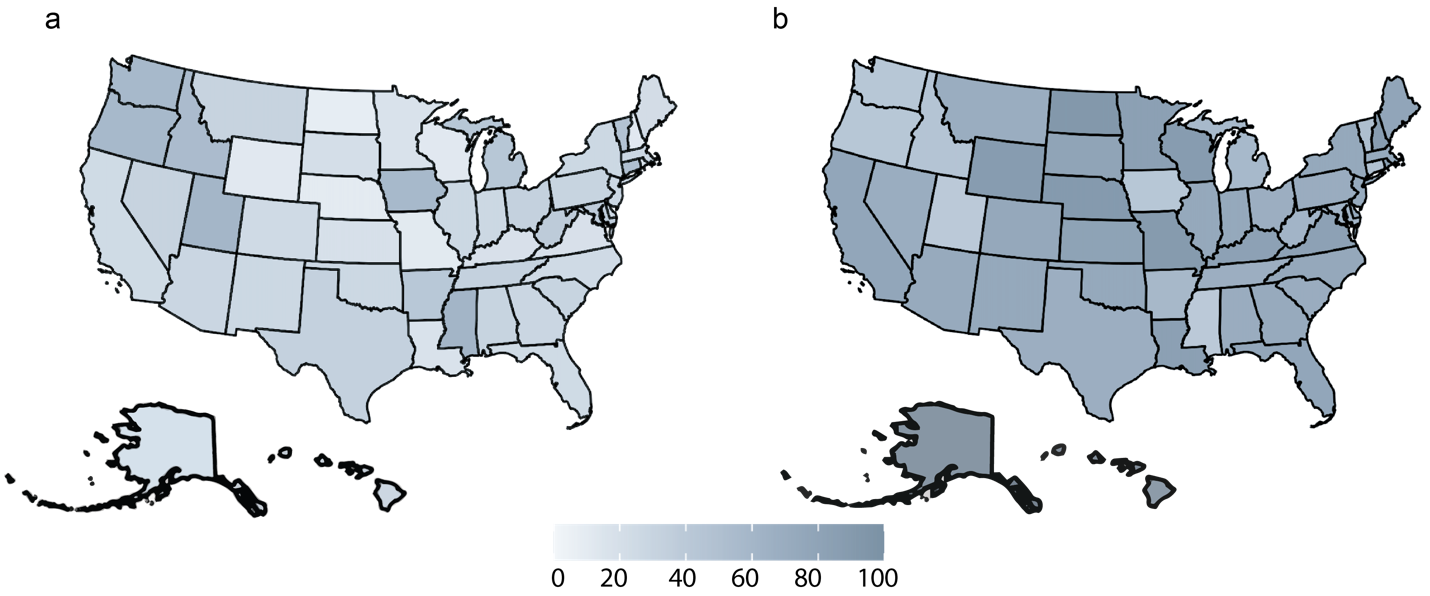


**FIGURE S1** The U.S. maps show (a) the demographics of individuals with peanut allergy and (b) cases of peanut-induced anaphylaxis. The maps are recreated using the data reported by Food Allergy Research and Education (FARE).


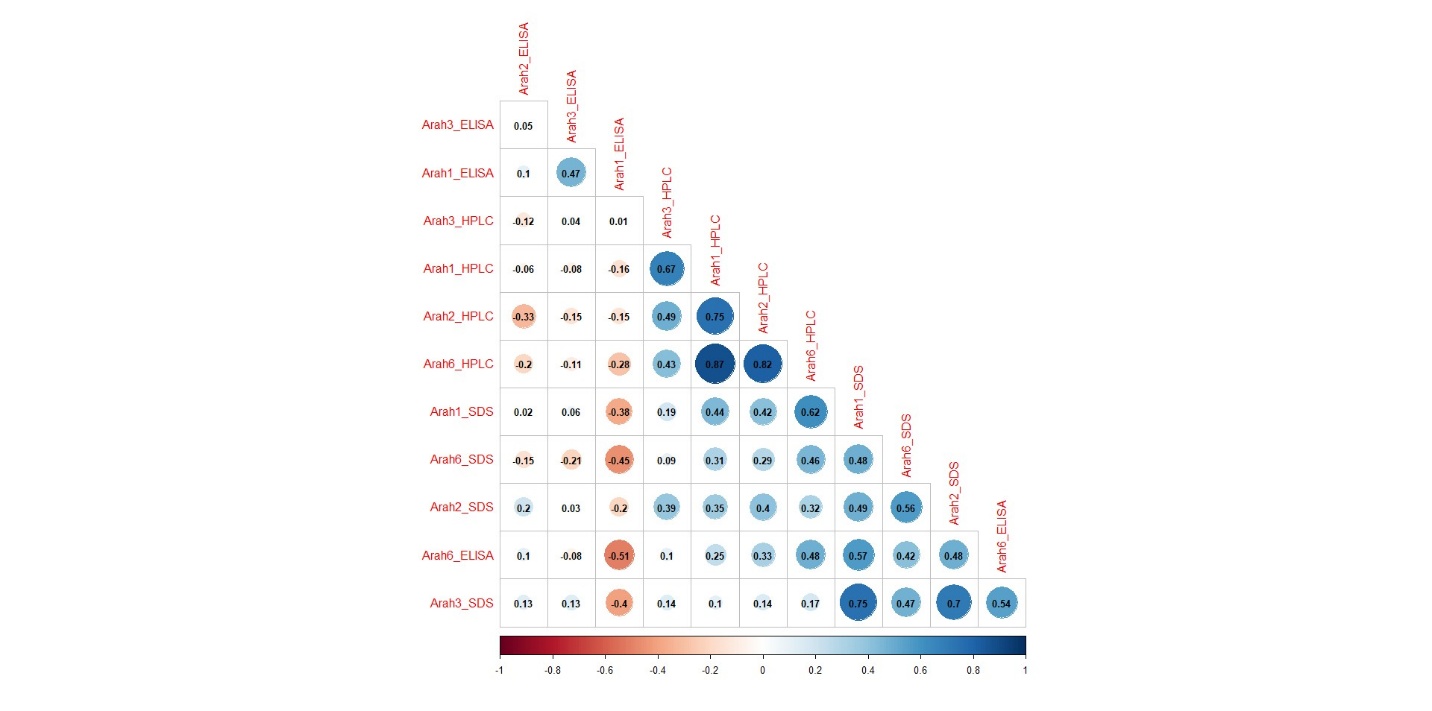


**FIGURE S2** Correlation plot for selected 23 US peanut mini core accessions
