# Supplementary material for: Genetic Regulation of Major Immunogenic Protein Accumulation in Peanut Seeds
Source: Research Square preprint supplement (doi:10.21203/rs.3.rs-8431108/v1), 2026-01-09
Supplement: Supplementary file 2 [file 758a4b303af7651ef5176d48.xlsx]

## Sheet: Table S1
Table S1: Densitogram values generated from the SDS page gels profiled for Ara h1, Ara h2, Ara h3 and Ara h6 in all the 92 US mini core peanut accessions
Code in Fig	Accession ID	Ara h 1 ug/g	Ara h 2 ug/g	Ara h 3 ug/g	Ara h 6 ug/g
10	PI 162857	1096.91	469.487	1760.96	477.833
40	PI 493729	1132.74	482.933	1805.75	493.296
42	PI 493938	1131.81	489.25	1836.14	476.622
52	PI 337406	945.777	444.6	1560.34	445.535
37	PI 493631	1117.78	484.68	1778.59	489.974
50	PI 337293	1011.88	451.254	1655.28	453.978
59	PI 356004	960.132	441.157	1576.62	432.51
54	PI 339960	1024.29	457.306	1696.37	457.327
57	PI 355268	984.542	449.885	1655.42	439.162
49	PI 331314	1225.97	498.016	1977.41	497.366
58	PI 355271	1883.88	446.061	1841.91	470.386
51	PI 337399	991.001	447.914	1633.8	451.401
11	PI 196622	807.879	569.712	1175.31	558.332
16	PI 259658	730.376	563.376	1315.32	620.622
53	PI 338338	498.924	450.919	1519.28	683.647
64	PI 399581	779.156	392.064	593.83	693.361
26	PI 502040	472.092	473.88	803.633	709.538
48	PI 331297	571.365	421.938	1285.58	569.758
24	PI 496401	653.334	457.311	823.227	562.562
29	PI 504614	826.483	503.189	851.116	572.129
13	PI 200441	1029.78	453.803	1663.68	451.342
15	PI 259617	1160.07	473.011	1878.4	460.304
18	PI 478819	1151.56	484.108	1829.56	476.127
14	PI 240560	1112.09	478.663	1817.05	468.774
27	PI 502111	1162.99	487.159	1830.15	503.669
34	PI 493356	1172.7	501.849	1890.85	495.892
19	PI 478850	1158.13	470.222	1906.11	482.719
23	PI 494795	1133.68	479.901	1825.94	496.369
17	PI 259836	902.446	387.206	1502.07	547.847
22	PI 482189	1837.2	396.325	1322.79	579.347
20	PI 481795	1228.47	503.495	2026.25	501.983
36	PI 493581	1171.14	496.522	1905.8	486.515
44	PI 497639	1209.07	498.145	1973.06	493.069
35	PI 493547	1071.81	463.655	1640.83	472.405
38	PI 493693	952.282	446.681	1602.77	436.706
25	PI 496448	1107.72	472.051	1814.14	464.658
28	PI 502120	1106.15	485.027	1737.27	469.792
39	PI 493717	1017.85	448.98	1615.91	451.728
30	PI 475863	1112.63	462.762	1750.18	461.509
31	PI 475918	1088.89	462.008	1736.09	470.647
32	PI 476025	1077.6	477.341	1713.48	463.383
33	PI 493329	1202.31	505.107	1928.9	502.795
43	PI 497571	1117.33	472.712	1732.25	475.011
45	PI 497318	1093.23	460.527	1660.78	453.207
12	PI 196635	405.385	291.244	276.992	325.472
95	PI 290620	1020.73	379.643	1104.66	357.233
78	PI 268696	955.932	420.454	1060.88	409.43
70	PI 461427	1038.51	427.927	1030	416.489
61	PI 371521	1015.28	447.613	1188.88	411.48
65	PI 403813	1083.67	430.071	1240.75	424.613
98	PI 295309	1095	411.43	1239.14	391.36
68	PI 429420	1040.23	390.107	1042.41	425.692
21	PI 482120	923.512	426.88	982.41	552.096
85	PI 471952	1179.62	366.759	1353.61	356.951
103	PI 313129	1151.68	369.355	1354.59	360.351
94	PI 290594	1088.12	359.167	1205.95	385.978
97	PI 295250	1096.18	353.671	1187.57	375.594
92	PI 290560	966.325	339.884	1031.92	359.059
96	PI 292950	1021.96	341.293	1126.93	365.403
88	PI 274193	964.322	338.748	1045.83	367.583
89	PI 288146	1109.2	356.581	1211.69	375.857
74	PI 476432	977.188	430.09	1097.34	403.826
79	PI 268755	949.665	419.183	1071.62	401.758
75	PI 268586	971.013	438.99	1077.88	400.156
71	PI 461434	1020.98	458.64	1208.88	417.948
76	PI 494018	967.465	422.191	1059.18	404.053
56	PI 343398	1028.61	361.779	317.61	463.08
63	PI 372305	1056.64	449.624	1203.95	419.465
77	PI 494034	1009.34	438.317	1158.89	425.077
72	PI 471952	956.718	432.975	1123.14	410.78
73	PI 471954	1042.94	432.801	1184.13	417.59
80	PI 268806	1169.36	379.667	1319.06	357.607
87	PI 271019	1034.86	322.897	1113.72	372.32
81	PI 268868	1163.91	379.643	1363.75	357.233
83	PI 270786	1254.52	392.433	1447.71	368.7
82	PI 268996	1164.57	381.195	1326.61	360.756
93	PI 290566	1282.69	383.77	1451.26	365.824
86	PI 270998	1261.95	382.325	1472.57	366.884
90	PI 288210	1115.93	345.265	1212.32	371.347
101	PI 296558	1082.59	345.218	1179.87	374.318
91	PI 290536	1020.73	342.827	1104.66	358.209
99	PI 295730	1156.96	385.191	1300.08	362.966
102	PI 298854	1171.42	380.717	1322.83	357.97
100	PI 296550	1097.4	346.352	1180.58	384.783
46	PI 497395	1406.59	487.321	1550.21	492.415
55	PI 343384	2850.72	722.305	2815.66	687.981
62	PI 372271	1584.39	589.113	2295.38	583.552
60	PI 370331	2478.87	643.188	1964.66	770.364
69	PI 442768	3178.19	515.874	1723.05	764.037
66	PI 407667	2928.5	443.374	2261.4	740.311
67	PI 408743	3678.56	600.619	418.654	730.584
84	PI 270905	2877.46	605.746	276.992	458.303

## Sheet: Table S2
Table S2: ELISA protein values for all the four proteins (Ara h1, Ara h2, Ara h3 and Ara j6) estimated in 92 US mini core peanut accessions.
Code in Fig	Accession ID	Ara h 1 ug/g	Ara h 2 ug/g	Ara h 3 ug/g	Ara h 6 ug/g
10	PI 162857	343.67	550.32	551.136	401
40	PI 493729	289.29	528.275	367.453	294.7
42	PI 493938	288.79	633.514	4231.2	265.9
52	PI 337406	420.447	698.922	4062.01	18.3
37	PI 493631	322.44	782.158	16.439	67.6
50	PI 337293	154.112	407.785	5126.81	41.2
59	PI 356004	73.698	473.621	3633.11	23.4
54	PI 339960	168.44	623.514	4841.95	16.4
57	PI 355268	31.303	603.051	5031.71	16.2
49	PI 331314	389.265	588.987	16475.7	43.3
58	PI 355271	80.744	804.88	11176.4	326.5
51	PI 337399	425.824	1225.44	5150.44	39.4
11	PI 196622	292.199	310.479	1547.57	453.7
16	PI 259658	70.03	241.201	1237.25	346.2
53	PI 338338	24.468	436.529	6875.57	443
64	PI 399581	76.112	239.363	8374.34	359
26	PI 502040	183.59	305.399	6584.36	94.3
48	PI 331297	101.375	819.06	4059.97	785.9
24	PI 496401	380.38	463.409	1012.91	61.1
29	PI 504614	392.17	724.526	44.132	133.8
13	PI 200441	74.73	302.669	812.175	14.4
15	PI 259617	208.45	320.195	1055.32	43
18	PI 478819	161.75	279.385	913.904	89.8
14	PI 240560	150.4	183.046	322.391	29.6
27	PI 502111	203.75	125.421	1257.01	140.1
34	PI 493356	274.15	218.795	65.442	19.6
19	PI 478850	263.57	178.518	537.277	235.3
23	PI 494795	312.54	174.756	801.027	219.2
17	PI 259836	161.3	23.1796	1611.5	246.3
22	PI 482189	215.76	224.207	947.882	26.1
20	PI 481795	515.87	369.348	1104.96	210.7
36	PI 493581	526.52	235.394	282.882	73.7
44	PI 497639	454.79	295.32	2028.97	49.6
35	PI 493547	445.06	248.221	275.826	77.4
38	PI 493693	435.62	328.353	36.121	198.2
25	PI 496448	500.81	413.917	45.266	284.6
28	PI 502120	609.79	305.48	661.136	333.7
39	PI 493717	658.65	448.663	198.668	321.4
30	PI 475863	656.51	294.846	212.618	571.4
31	PI 475918	415.37	270.935	461.213	862.3
32	PI 476025	275.09	280.677	392.627	472.6
33	PI 493329	793.49	428.995	27.388	761.9
43	PI 497571	432.33	237.07	1126.59	39.9
45	PI 497318	1771.65	536.571	4099.97	25.4
12	PI 196635	129.9	244.591	3544.04	197.8
95	PI 290620	242.96	408.814	12807	739.3
78	PI 268696	78.75	317.916	3392.96	17.7
70	PI 461427	157.27	293.129	5200.66	37.3
61	PI 371521	219.826	281.813	4010.21	20.8
65	PI 403813	159.537	266.981	5307.67	34.9
98	PI 295309	162.36	379.407	4930.52	25.5
68	PI 429420	107.809	207.232	5263.88	34.3
21	PI 482120	69.26	315.146	59.606	43.8
85	PI 471952	214.53	314.739	3905.6	32.4
103	PI 313129	173.17	369.076	2136.44	76.9
94	PI 290594	249.15	246.578	2852.54	17.2
97	PI 295250	244.52	269.183	6459.21	42.4
92	PI 290560	225.01	180.858	5601.4	25.3
96	PI 292950	102.79	164.122	6481.6	25.6
88	PI 274193	461.93	158.972	5477.09	23.7
89	PI 288146	494.83	241.87	5189.23	34.3
74	PI 476432	324.797	618.583	4322.03	41.6
79	PI 268755	368.39	607.09	8677.87	15.1
75	PI 268586	286.73	707.832	9658.44	27.9
71	PI 461434	369.232	604.435	13831.9	40.8
76	PI 494018	371.71	519.275	13492.6	23.9
56	PI 343398	201.177	570.528	11056.3	10.9
63	PI 372305	197.472	438.919	35365.7	48.1
77	PI 494034	491.73	434.004	3643.73	24.1
72	PI 471952	522.297	409.832	7648.13	44.2
73	PI 471954	716.373	433.522	5514.81	42.7
80	PI 268806	586.19	628.027	14857.6	19.7
87	PI 271019	753.02	647.604	1050.68	30.9
81	PI 268868	548.67	379.874	5691.84	24.4
83	PI 270786	498.57	370.335	1507.63	12.4
82	PI 268996	348.43	398.287	3759.69	17.9
93	PI 290566	330.13	311.228	7242.43	24.3
86	PI 270998	254.01	453.536	7742.39	22.5
90	PI 288210	368.25	413.618	529.33	22
101	PI 296558	298.81	424.595	3725.55	28.4
91	PI 290536	520.97	445.59	585.966	28.8
99	PI 295730	183.42	524.056	1681.78	33
102	PI 298854	379.26	629.398	2306.76	24.1
100	PI 296550	214.56	585.44	9734.96	43.8
46	PI 497395	513.97	416.597	71262.4	181
55	PI 343384	5.346	719.06	3064.97	804.8
62	PI 372271	61.609	334.901	21913.6	377.1
60	PI 370331	6.207	363.724	4326.01	1069.7
69	PI 442768	7.031	209.645	7771.96	1120
66	PI 407667	61.636	280.01	3720.19	463.9
67	PI 408743	346.799	384.204	6560.9	648
84	PI 270905	60.08	362.063	4600.08	1962.6

## Sheet: Table S3
Table S3: Protein quantities for Ara h1, Ara h2, Ara h3 and Ara h6 estimated using ELISA in 23 selected US minicore peanut accessions
	Arah 1 ug/g	Arah 2 ug/g	Arah 3 ug/g	Arah 6 ug/g
11	26.75	224.94	216.73	18.77
24	19.46	88.1	122.2	12.47
26	17.52	59.44	104.57	11.75
29	31.66	109.73	91.64	18.87
16	20.57	145.37	51.95	13.55
48	6.44	12.58	9.96	6.17
53	8.2	28.98	11.75	7.21
58	25.29	88.64	119.31	14.46
64	25.87	92.08	174.05	17.43
12	17.14	98.64	71	10.87
17	13	48.37	61.96	9.18
21	29.31	124.77	218.88	18.98
22	19.03	79.87	164.08	13.56
56	34.16	95.33	74.55	21.68
95	17.4	77.64	151.65	13.38
46	17.8	67.43	127.35	10.89
55	16.88	59.71	136.69	10.79
60	59.89	208.54	343.8	38.88
62	28.35	136.25	191.66	17.93
66	28.25	147.67	60.99	22.64
67	19.03	107.75	60.76	13.85
69	30.56	202.61	34.61	38.23
84	32.99	121.99	65.23	21.04

## Sheet: Table S4
Table S4: Protein quantities estimated using LCMS for Ara h1, Ara h2, Ara h3 and Ara h6 in 9 selected US minicore peanut accessions
Sample codes	Ara h1 (% ot total protein, w/w)	Ara h2 (% of total protein, w/w)	Ara h3 (% of total protein, w/w)	Ara h6 (% of total protein, w/w)
16	0.127534	0.0566273	0.170629	0.0276618
24	0.186731	0.0202013	0.163024	0.0224337
53	0.134547	0.0127697	0.19661	0.0213756
46	0.171797	0.0261378	0.17254	0.0223646
55	0.265706	0.0152801	0.0587609	0.0379812
62	0.127279	0.00951358	0.209202	0.0166104
66	0.13919	0.0126339	0.165848	0.0166218
69	0.136505	0.014693	0.211542	0.018925
84	0.174235	0.00666734	0.163624	0.00602337
